# Supplementary material
Source: publisher site journal article supplement (https://www.dovepress.com/article/573851)
Supplement: Supplementary file 1 [file 573851%20Revised%20Supplementary%20Materials.docx]

**Supplementary Figure 1: Questionnaire**

**Injury description**

1. Your sex [Single-choice question]:

A Male

B Female

2. Your age: years

3. Your province [Single-choice question]:

A Beijing

B Other:

4. The time from the moment of injury [Single-choice question]:

A Less than 3 months

B 3 to 6 months

C 6 to 12 months

D More than 1 year

5. The site of injury [Single-choice question]:

A Low extremity (ankle, calf, knee, thigh, or hip)

B Upper extremity (hand, wrist, forearm, elbow, upper arm, or shoulder)

C Torso (waist, back, or neck)

D Others:

6. How do you feel about at the time of injury? [Single-choice question]

A Minor pain with normal range of motion

B Major pain with reduced range of motion

C Major pain with immobilization

7. Fractures or not [Single-choice question]:

A Yes

B No

C Undiagnosed

8. Surgery or not [Single-choice question]:

A Yes

B No

9. External fixation or not [Single-choice question]:

A Yes

B No (Please skip to Question 11)

10. The duration of external fixation: [Single-choice question]

A Less than 1 week

B 1 to 2 weeks

C 2 to 4 weeks

D 1 to 3 months

E 3 to 6 months

F More than 6 months

11. What’s your sport habits before injury [Single-choice question]?

A Athlete

B Not an athlete, but with habits of regular exercises

C Exercising occasionally

D Rarely exercising

12. How do you feel about your site of injury now [Multiple-choice question]?

A Normal

B A little bit discomfort, but without any influence of moving

C Reduced range of joint motion

D Reduced muscle strength

E Unmovable

F Others:

13. Compared with your preinjury sports habits, is there any change now [Multiple-choice question]?

A Without any change

B Reduced of sport abilities

C Reduced of exercise volume because of fearing of getting hurt again

D Changed of sports (Stop previous sports and start new one)

E Others:

**Medical treatment experience**

14. Did you go to hospital after the injury [Single-choice question]?

A Yes (Please skip to Question 16)

B No (Please skip to Question 15)

15. Why didn’t you go to hospital [Multiple-choice question]?

A I didn’t think my injury was serious

B I was too busy to go to hospital

C Because of insufficient medical resources

D I didn’t think the doctors could help me

E I couldn’t afford it

F Others:

(Please skip to Question 24)

16. What were the treatments of the first doctor you met [Multiple-choice question]?

A Physical examinations

B Imaging tests (X-ray, CT, or MRI)

C Surgeries

D External fixation

E Routine treatment suggestions (Ice, immobilization, medication, or elevating the injury extremity)

F Functional exercise guidance

G Referral to the rehabilitation department

H Others:

17. Did you go to the rehabilitation department [Single-choice question]?

A Yes (Please skip to Question 19)

B No (Please skip to Question 18)

18. Why didn’t you go to the rehabilitation department [Multiple-choice question]?

A I didn’t know how the rehabilitation department could help me in my recovery

B I didn’t know the procedures for seeking rehabilitation treatment

C I didn’t need to go to the rehabilitation department, because the injury was not serious

D I was too busy to go to the rehabilitation department

E I couldn’t afford it

F I didn’t know how to choose good physiotherapists

G Good physiotherapists were not enough, so it was difficult to make an appointment

H: Others:

(Please skip to Question 24)

19. Why did you go to the rehabilitation department [Multiple-choice question]?

A Other doctor’s suggestion

B Coach’s suggestion

C Friends or family members’ suggestion

D Persuaded by the online information

E Own experience

F Others:

20. What kind of medical institution did you receive the rehabilitation treatment [Multiple-choice question]?

A The rehabilitation department of general hospital

B Hospital majored in rehabilitation

C Studio of rehabilitation

21. What kind of treatment did you received in the rehabilitation department [Multiple-choice question]?

A Physiotherapy

B Manual therapy

C Functional training

D Others:

(Please skip to Question 24 if didn’t choose “C”)

22. Did you complete the exercise rehabilitation plan made by the physiotherapist [Multiple-choice question]?

A Uncompleted

B Partly completed

C Completed

(Please skip to Question 24 if choose “C”)

23. Why didn’t you complete the exercise rehabilitation plan [Multiple-choice question]?

A Worrying about delayed healing by too much training

B Self laziness

C Not fully understanding the plan

D Health reasons (pain or fatigue)

E Cost reasons

F Lack of enough time to do the exercises

G Others:

**Attitude of exercise rehabilitation**

24. How important do you think the exercise rehabilitation is for your recovery? [ Single-choice question]

A Very important

B Important

C Neutral

D Unimportant

E Very unimportant

F Unknown

**Supplementary Material 1: Interview Guide**

For patients or patent’s family members:

1. What’s the treatment experience of you/your family member after injury? Who is the first person to give instruction after the injury (For example: coach, teacher, doctor)? Did they recommend exercise rehabilitation?

2. Have you/your family members visited an orthopedic surgeon? What instructions did the orthopedic surgeon give (For example, ice, immobilization, medication, stretching, when to do exercise, how to exercise)? Do you think the guidance was enough? Could you figure out what you should do?

3. Do you know the harm of immobilization? How long does the harm occur after immobilization?

4. Do you think it’s necessary to visit physiotherapists to help you recover? If necessary, what’s the proper time point? (For example: at the beginning of injury, at the end of immobilization, or when the wound stop hurting)

5. Have you/your family members ever received any exercise rehabilitation guidance? Please briefly describe it. If not, why? (For example: I think I don’t need it, I think I need it but don’t know what kind of doctor could help me, I don't know what institutions or physiotherapists I can trust, the number of physiotherapists is not enough to meet patients’ needs, I don’t have enough time, I can’t afford it.)

6. Will you seriously complete or help your family member to complete the rehabilitation plan? What’s the difficulties for adhering to the plan?

7. What kind of guidance/supervision model do you want for exercise rehabilitation? How many times of face-to-face training can you arrange each week? Do you think online teaching will reduce the quality of your exercise?

For coaches:

1. How many cases of acute musculoskeletal injury did you meet each year?

2. What do you usually do when you encounter this situation?

3. If you thought it was necessary for him to go to the hospital, did you recommend him to the rehabilitation department apart from orthopedics or emergency?

4. If possible, do you think it is necessary for all injured athletes to go to the rehabilitation department regardless of the severity of injury?

5. In your previous experience, did the physiotherapists give enough help to the injured person? If the help wasn't enough, why?

6. What kinds of training have you received about exercise rehabilitation?

7. Did you give your own guidance on exercise rehabilitation? If not, why?

For orthopedic doctors:

1. How many cases of acute musculoskeletal injury did you meet each year? What kind of treatment did you usually give?

2. Would you recommend patients to go to rehabilitation department? What kind of patient need instruction of physiotherapist? What’s the proper time point?

3. Do you think the exercise rehabilitation guidance for such patients is enough now? If not, why? (For example, lack of enough physiotherapists or institutions, patients’ lack of knowledge of rehabilitation importance, lack of proper referral process)

4. If you think exercise rehabilitation is very important, how to put it into practice? What’s your suggestions? (For example, how to make a referral, how to improve patient education on exercise rehabilitation?)

5. Which one do you think could give patients exercise rehabilitation guidance— orthopedic surgeon, physiotherapist, or personal trainer?

6. What’s your recommendation about clinical practice? Do you like face-to-face demonstrations or the on-line resources? How about the frequency? What’s the difficulties of online guidance?

7. Do you think the patients like to afford the exercise rehabilitation or not?

For physiotherapist:

1. How many patients come to you for exercise rehabilitation each week? How do you guide and supervise patients in their exercise rehabilitation?

2. How do they find out that they can seek help from you—are they referred by orthopedic doctors or friends? Do you think commercial advertisements about exercise rehabilitation are useful?

3.What do you think about the acknowledge of exercise rehabilitation? What’s the reasons for lack of knowledge? How to improve it?

4. Do you think if the patients have received enough instruction of exercise rehabilitation?

5. How to guide the patients timely and adequately?

6. Which one do you think could give patients exercise rehabilitation guidance—an orthopedic surgeon, physiotherapist, or personal trainer?

7. What’s your recommendation about clinical practice? Do you like face-to-face demonstrations or the on-line resources? How about the frequency? What’s the difficulties of online guidance?

For personal trainer:

1. Have you provided your clients who had musculoskeletal injury with guidance or a plan for exercise rehabilitation?

2. Which one do you think could give exercise rehabilitation guidance—an orthopedic surgeon, physiotherapist, or personal trainer?

3. What’s your suggestions to your friends or family members with acute musculoskeletal injure?

4. Have you tried online training? What’s advantage or disadvantage of online guidance? What’s your recommendation about practice?

**Supplementary Table 1: Participant Characteristics**

| No. | Role | Sex | Age (year) | Characteristics |
| --- | --- | --- | --- | --- |
| 1 | Patient | M | 40-50 | - Sprained ankle，with fracture - Exercise occasionally before |
| 2 | Patient | F | 20-30 | - Foot crushing，without fracture - Exercise seldomly before |
| 3 | Patient | F | 10-20 | - Sprained ankle，without fracture - Exercise occasionally before |
| 4 | Patient’s family member | F | 50-60 | - Mother of No.3 |
| 5 | Patent | F | 50-60 | - Labral tear of hip joint - Exercise occasionally before |
| 6 | Personal trainer | M | 20-30 | - Working in gym - Major in functional training |
| 7 | Patient | M | 50-60 | - Sprained ankle，without fracture - Exercise occasionally before |
| 8 | Patient | M | 20-30 | - Rupture of the anterior cruciate ligament - Footballer before |
| 9 | Coach | M | 30-40 | - Coach of athletics in primary school |
| 10 | Patient | M | 40-50 | - Sprain of shoulder, without fracture - Exercise occasionally before |
| 11 | Personal trainer | M | 20-30 | - Working in gym - Major in functional training |
| 12 | Coach | M | 30-40 | - Coach of football in university - Footballer before |
| 13 | Patient | M | 50-60 | - Wrist fracture - Exercise seldomly before |
| 14 | Patient | M | 20-30 | - Clavicular fracture - Footballer before |
| 15 | Patient | M | 40-50 | - Sprain of shoulder, with fracture - Exercise regularly before |
| 16 | Physiotherapist | M | 20-30 | - Working in public hospital |
| 17 | Personal trainer | M | 20-30 | - Working in gym - Major in strength training |
| 18 | Patient’s family member | F | 50-60 | - Mother of No.19 |
| 19 | Patient | M | 10-20 | - Sprained ankle，without fracture - Exercise occasionally before |
| 20 | Patient | F | 30-40 | - Sprained ankle，without fracture - Exercise regularly before |
| 21 | Orthopedic surgeon | M | 50-60 | - Major in trauma treatment |
| 22 | Physiotherapist | F | 30-40 | - Working in private hospital |
| 23 | Orthopedic surgeon | M | 40-50 | - Major in trauma treatment |

Abbreviations: M, male; F, female

**Supplementary Table 2: Quotations**

| **Theme** | **Subtheme** | **Quotations** |
| --- | --- | --- |
| **Capacity** | Patient’s lack of knowledge about the requirement of exercise rehabilitation guidance in the early stage of injury | - No one advised me/my family member to visit to the rehabilitation department after the injury (participant 1，2，3，5，7，8，10，13，14，19，and 20，patient；participant 4 and 18，patient’s family member). - Many people do not know how the physiotherapists can help after an injury, even if the injured person is a healthcare worker (participant15, patient). - I usually recommend 4-6 weeks of immobilization to patients who do not need surgery (participant21, orthopedic surgeon). - Patients are usually unaware of the necessity of exercise rehabilitation, because both the orthopedic surgeon and the physiotherapist think that returning to normal life is enough (participant12, football coach). - At the beginning of injury, I only cared about the surgery, but not rehabilitation (participant8，patient，footballer）. |
| Patient’s difficulty in moving | - I had difficulty in moving after the injury, and every time I went to the rehabilitation department, I worried about causing trouble to others. This was one of the reasons why I did not visit the rehabilitation department (participant2 and 20, patient). |
| Patient’s lack of time in exercise rehabilitation | - I can finish offline exercise rehabilitation treatment no more than once a week (participant2 and 13, patient). |
|  | - 3-4 times a week of exercise rehabilitation treatment were difficult to complete if it was not during the summer holidays (participant8, patient, footballer). |
| **Opportunity** | Lack of instruction from orthopedic surgeon about exercise rehabilitation | - Apart from taking X-rays, I/my family member was instructed applying ice, compression, elevation of the limb, immobilization, rest, and pain relief, but not exercise rehabilitation, by the orthopedic surgeon (participant1，2，3，5，7，8，10，13，14， 15，19，and 20, patient; participant 4 and 18, patient’s family member). - I rarely tell patients how to maintain moderate physical activity and move the uninjured parts during immobilization (participant23, orthopedic surgeon). - Generally, orthopedic surgeons focus on performing surgeries well and minimizing the risk of complications. They do not have time to address exercise rehabilitation in detail. It’s too luxurious for them to give exercise rehabilitation guidance for more than 40 min in the outpatient clinic (participant16, physiotherapist). |
| Lack of enough physiotherapists who are majored in exercise rehabilitation | - I don’t recommend others to go to the rehabilitation department of general hospital, because therapists do not know how to exercise (participant8, patient, footballer). - Orthopedic or rehabilitation specialists who are not majoring in sports medicine often believe that making patients back to their normal lives is enough. In addition, they don’t care about whether they could keep their pre-injury sports (participant12, coach of football). - It is often difficult for patients to have exercise rehabilitation several times a week due to immobility or time problems, especially when the clinic is too far away. But it is difficult to find good rehabilitation clinics nearby (participant16, physiotherapist). - Talents of excise rehabilitation are much needed now (participant 16，physiotherapist). - Because of business interests, the ability of physiotherapists in private hospitals varied much (participant16，physiotherapist). - Personal trainers in gyms often focuses on training. Their knowledge is not enough to give exercise rehabilitation guidance to their customs (participant17，personal trainer). - The quantity of physiotherapist is not enough (participant21，orthopedic surgeon). |
| Difficulty in getting information of physiotherapists or rehabilitation clinics | - Finding physiotherapists with enough knowledge and experience is much more important than the clinic itself. Unfortunately, it’s very difficult for the patient to identify (participant6, personal trainer). - I used to be an athlete, retired from the professional team, and I know some excellent physiotherapists served at professional teams, so I often refer my injured team members to them for exercise rehabilitation. But these professional physiotherapists might not be found by other patients (participant12, football coach). - Some of my patients were introduced by orthopedic surgeons, others got my information from internet. Many of them shared the experiences on social software, such as "Little Red Book" (participant16, physiotherapist). - The ability of physiotherapists in private hospitals varied much, so patients usually preferred to trust public hospitals (participant16, physiotherapist). |
|  |  |
| Motivation | Patient’s lack of knowledge about the benefits of excise rehabilitation and harms of immobilization | - I don’t know what happened about my body when immobilization. But I don’t like to stay in bed and want to get back to work as soon as possible (participant1, patient). - I know muscle loss will happen when immobilization. But I’m not sure when all of this could be started (paticipant3, 5, 7, and 13, patient). - Before developing plans, it is necessary to tell patients the disadvantages without exercise rehabilitation and how long the training effects will be seen (paticipant10, patient). |
| Underestimation of injury severity | - At first, I didn’t realize the severity and only treat the wound in the emergency (paticipant5，patient). - I didn’t go to hospital at first. Minor injuries could recover automatically (paticipant7, 10, 13, patient). - Exercise rehabilitation should not be required for an occasional sprained ankle. But if this happened repeatedly, you need the help of physiotherapists (participant4, patient’s family member). |
| Low expectation of the rehabilitation | - I’m not professional athlete, so I don’t need systemic exercise rehabilitation (paticipant3, 13, patient). - Patient’s expectation of the rehabilitation largely determines whether he is willing to have exercise rehabilitation and how well the training is performed (participant4, patient’s family member). - Completing exercise rehabilitation needs much more time and effort, so it’s not easy, unless the patient’s symptom is serious enough (participant5, patient). - Exercise rehabilitation is suitable for young people who has much more physical activities and expects rapid recover. While old patients might not need this (paticipant7, patient). - Athletes under pressure of match would be more active for rehabilitation training (participant9, coach of athletics). - Whether the exercise rehabilitation program can be completed depends mainly on the patient’s expectation of the speed and outcome of the rehabilitation (participant15, patient). |
| **Behavior** | Orthopedic surgeon education on exercise rehabilitation | - The suggestions of orthopedic surgeon are conservative. They usually emphasize immobilization but not maintaining moderate physical activity (paticipant1, patient). - Orthopedic surgeons seldom care how to let their patients keep their pre-injury sports (participant 6, personal trainer). - I often help my injured customers to perform functional training. Most of them came to me after acute phase. I think it’s a little bit late. During acute phase, doctors were too conservative to tell patients how to keep moderate physical activity. They paid more attention to immobilization (participant11, personal trainer). |
| Referral system between orthopedics and rehabilitation to give patients the opportunity to receive rehabilitation treatment at an early stage of injury | - After this injury, I think physiotherapists should intervene as early as possible, so cooperation between orthopedics and rehabilitation is very important (participant1, patient). - My child won’t hurt his ankle repeatedly if exercise rehabilitation had been emphasized at the early stage. Direct referral to physiotherapists by orthopedic surgeons is preferred (paticipant4, patient’s family member). |
|  | - I experienced a lot of difficulties when trying to return exercise by myself without any rehabilitation instruction. Instructions from physiotherapists should be got as early as possible (paticipant14, patient, footballer). - Orthopedic surgeons mainly focus on surgeries. They don’t have time to care about the rehabilitation problems, so we need some referral processes to let the physiotherapists help the patients at the early stage of injury (paticipant15, patient). - There are two time points for the intervention of physiotherapists. One is telling the patient how to maintain a certain amount of physical activity during immobilization stage and when to start moving the injured area, and the other is giving exercise rehabilitation instruction at the end of immobilization (participant20, patient). |
| Combining online remote exercise supervision and face-to-face guidance | - When implementing the exercise rehabilitation training plan, it is easy to be lazy because the effect cannot be seen in a shout term, so patients need supervision (participant1 and 10, patient). - I think face-to-face guidance is more appropriate at first. The physiotherapist shows me how to exercise, then I can practice by myself at home. Later, evaluation and face-to-face guidance may be performed again (paticipant3, patient). - Instruction combined face-to-face guidance with online supervision can make it easy to complete the training plan (paticipant5, patient). - The main difficulty of online instruction is that it’s impossible to totally evaluate the quality of patients’ sports. The effects of training will be reduced. But online remind might be helpful (participant6, personal trainer). - There’s no technical difficulty of online guidance. It’s time saving, easy to compliance, and has larger audience (paticipant11, personal trainer). - I think the first difficulty of exercise rehabilitation is persisting. Supervision online might be helpful (paticipant13, patient). - New exercises are a little bit difficult for patients without sport habits. Video library of exercise demonstrations might be helpful for completing homework (paticipant15, patient). - Online guidance can partially solve the inconvenience of patients coming to the hospital. But it cannot replace face-to-face assessment and guidance. The ideal model is combining of online guidance and supervision with offline follow-up (paticipant16, physiotherapist). - Online guidance will be less effective than face-to-face teaching (participant19, 20 and 18, patient and patient’s family member respectively). |
|  | Popular science education | - I prefer to look for knowledge of exercise rehabilitation from web (paticipant3, patient). - I need to know how much does exercise rehabilitation cost. What are the training effects and how long does it take to achieve these effects? And what’s the final difference between exercise and no training (paticipant5, patient)? - Popular science education online has made more and more patients know that physiotherapists can help them (paticipant16, physiotherapist). - Patients need to be motivated by understanding the effect of exercise rehabilitation. Then they may carry out the training seriously (paticipant18, patient’s family member). - Pain or discomfort will inevitably occur during the training, which will cause patients to be afraid of aggravating the injury. So, it is necessary to educate the patients about their pain expectations. They won’t complete the plan before understanding what kind of pain is acceptable (paticipant20, patient). |
|  | Support from insurance policies | - I cannot afford the rehabilitation training of the public hospital where I received the surgery (paticipant8, football athlete). - We need more support for development. Problems of rehabilitation have been paid more attention by health insurance management department. For example, rehabilitation of chronic pain for 6 months can be reimbursed now, which was 3 months before (paticipant16, physiotherapist). - There’s no charge for online exercise rehabilitation instruction (paticipant16, physiotherapist). - The cost is one of the reasons why my child cannot receive the offline trainings twice a week (paticipant18, patient’s family member). - Under current health insurance policy, rehabilitation after injury can’t be reimbursed if you didn’t receive any surgeries. So, cost problems might interfere the choice of exercise rehabilitation (paticipant23, orthopedic surgeon). |
|  |  |  |
